# Supplementary material for: In-Situ Studies of Structure Transformation and Al Coordination of KAl(MoO4)2 during Heating by High Temperature Raman and 27Al NMR Spectroscopies
Source: MDPI journal article supplement (doi:10.3390/ma10030310), 2017-03-17
Supplement: s1 [file s1]

# Supplementary Materials: *In-Situ* Studies of Structure Transformation and Al Coordination of $\text{KAl}(\text{MoO}_4)_2$ during Heating by High Temperature Raman and $^{27}\text{Al}$ NMR Spectroscopies

Min Wang, Jinglin You, Alexander Sobol, Liming Lu, Jian Wang and Yingfang Xie

**Table S1.** The calcination process for preparing crystalline  $\text{KAl}(\text{MoO}_4)_2$ .

| Heat Treatment                                          | Parameter Settings of Temperature (K) | Dwell Time (min) | Crucible |
|---------------------------------------------------------|---------------------------------------|------------------|----------|
| 1                                                       | 593                                   | 120              | Pt       |
| 2                                                       | 773                                   | 180              |          |
| 3                                                       | 873                                   | 2400             |          |
| and then cooled slowly (0.24 K/min) to room temperature |                                       |                  |          |

**Table S2.** The heating process used to prepare amorphous  $\text{KAl}(\text{MoO}_4)_2$ .

| Heat Treatment                                                                                                    | Parameter Settings of Temperature (K) | Dwell time (min) | Crucible |
|-------------------------------------------------------------------------------------------------------------------|---------------------------------------|------------------|----------|
| 1                                                                                                                 | 593                                   | 120              | Pt       |
| 2                                                                                                                 | 923                                   | 120              |          |
| 3                                                                                                                 | 1173                                  | 240              |          |
| The melt was then quenched by the “hammer-and-anvil” technique (by liquid quenching between two metallic plates). |                                       |                  |          |

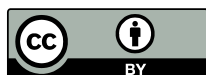

© 2017 by the authors. Submitted for possible open access publication under the terms and conditions of the Creative Commons Attribution (CC BY) license (<http://creativecommons.org/licenses/by/4.0/>).
